# Supplementary material for: Maternal and Neonatal Outcomes of Women Conceived Less Than 6 Months after First Trimester Dilation and Curettage
Source: J Clin Med. 2022 May 13;11(10):2767. doi: 10.3390/jcm11102767 (PMC9147896; doi:10.3390/jcm11102767)
Supplement: Supplementary file 1 [file jcm-11-02767-s001.zip › jcm-1673181-supplementary.pdf]

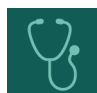

**Table S1.** Maternal and neonatal obstetrics outcomes among women with previous single pregnancy loss without and without D&C.

|                                       | No D&C <i>n</i> = 600 | D&C <i>n</i> = 956 | <i>p</i> Value |
|---------------------------------------|-----------------------|--------------------|----------------|
| Gestational age at delivery           | 39.1±2                | 39.2±1.7           | 0.23           |
| Gestational age at delivery < 37 week | 26 (4.3%)             | 44 (4.6%)          | 0.80           |
| Gestational age at delivery > 41 week | 57 (9.5%)             | 83 (8.7%)          | 0.59           |
| Premature rupture of membranes        | 79 (13.2%)            | 119 (12.4%)        | 0.68           |
| Prolonged hospital stay *             | 12 (2%)               | 14 (1.5%)          | 0.42           |
| Retained placenta/placental fragments | 24 (4.3%)             | 30 (3.4%)          | 0.37           |
| Maternal ICU admission                | 0 (0%)                | 1 (0.1%)           | 0.43           |
| Postpartum hemorrhage                 | 60 (10%)              | 73 (7.6%)          | 0.10           |
| Placental abruption                   | 15 (2.5%)             | 15 (1.6%)          | 0.19           |
| Non-vertex presentation               | 16 (2.7%)             | 26 (2.7%)          | 0.95           |
| Hemoglobin drop, gram/dL              | 1.3 ± 1.1             | 1.2 ± 1            | 0.64           |
| Hemoglobin drop ≥ 4 gram/dL           | 23 (3.8%)             | 26 (2.7%)          | 0.22           |
| Chorioamnionitis                      | 11 (1.8%)             | 11 (1.2%)          | 0.27           |
| Puerperal fever                       | 8 (1.3%)              | 9 (0.9%)           | 0.47           |
| Blood products transfusion            | 5 (0.8%)              | 6 (0.6%)           | 0.64           |
| Hysterectomy                          | 0 (0%)                | 0 (0%)             | N/A            |
| In labor cesarean                     | 28 (4.7%)             | 40 (4.2%)          | 0.65           |
| Cesarean delivery                     | 55 (9.2%)             | 95 (9.9%)          | 0.62           |
| Birthweight                           | 3286.7 ± 493.6        | 3298.3 ± 483.8     | 0.65           |
| Birthweight ≥ 4000 grams              | 21 (3.5%)             | 40 (4.2%)          | 0.50           |
| Large for gestational age             | 64 (10.7%)            | 113 (11.8%)        | 0.48           |
| Small for gestational age             | 45 (7.5%)             | 61 (6.4%)          | 0.40           |
| Intrauterine Fetal Death              | 3 (0.5%)              | 3 (0.3%)           | 0.56           |
| 1-Minute Apgar score < 7              | 27 (4.5%)             | 44 (4.6%)          | 0.94           |
| 5-Minute Apgar score < 7              | 16 (2.7%)             | 27 (2.8%)          | 0.86           |
| NICU admission                        | 38 (6.4%)             | 52 (5.4%)          | 0.46           |
| Birth asphyxia                        | 3 (0.5%)              | 8 (0.8%)           | 0.44           |

Data are mean ± standard deviation; number (%); D&C–Dilation and Curettage ICU–Intensive Care Unit, NICU Neonatal intensive-care unit. \* prolonged postpartum hospital stays of >5 days for vaginal deliveries and > 7 days for CD.

**Table S2.** Maternal and neonatal obstetrics outcomes among women with different type of pregnancy loss management.

|                                       | Expectant Management<br>(Reference Group)<br><i>n</i> = 128 | Medical <i>n</i> = 558 | <i>p</i> Value | Elective D&C <i>n</i> = 872 | <i>p</i> Value | Urgent D&C <i>n</i> = 215 | <i>p</i> Value |
|---------------------------------------|-------------------------------------------------------------|------------------------|----------------|-----------------------------|----------------|---------------------------|----------------|
| Gestational age at delivery           | 39.3 ± 1.3                                                  | 39.1 ± 2.2             | 0.42           | 39.2 ± 1.8                  | 0.71           | 39.2 ± 1.7                | 0.69           |
| Gestational age at delivery < 37 week | 3 (2.3%)                                                    | 25 (4.5%)              | 0.27           | 43 (4.9%)                   | 0.19           | 15 (7%)                   | 0.06           |
| Gestational age at delivery > 41 week | 16 (12.5%)                                                  | 48 (8.6%)              | 0.17           | 77 (8.8%)                   | 0.18           | 15 (7%)                   | 0.08           |
| Premature rupture of membranes        | 20 (15.6%)                                                  | 67 (12%)               | 0.27           | 114 (13.1%)                 | 0.43           | 25 (11.6%)                | 0.29           |
| Prolonged hospital stay *             | 2 (1.6%)                                                    | 11 (2%)                | 0.76           | 15 (1.7%)                   | 0.90           | 0 (0%)                    | 0.07           |
| Retained placenta/placental fragments | 7 (5.9%)                                                    | 20 (3.8%)              | 0.30           | 25 (3.1%)                   | 0.12           | 7 (3.5%)                  | 0.31           |

|                            |                |                |      |                |      |                |      |
|----------------------------|----------------|----------------|------|----------------|------|----------------|------|
| Maternal ICU admission     | 0 (0%)         | 0 (0%)         | N/A  | 1 (0.1%)       | 0.70 | 0 (0%)         | N/A  |
| Postpartum hemorrhage      | 9 (7%)         | 59 (10.6%)     | 0.23 | 65 (7.5%)      | 0.86 | 17 (7.9%)      | 0.77 |
| Placental abruption        | 5 (3.9%)       | 11 (2%)        | 0.19 | 14 (1.6%)      | 0.08 | 3 (1.4%)       | 0.14 |
| Non-vertex presentation    | 4 (3.1%)       | 16 (2.9%)      | 0.88 | 23 (2.6%)      | 0.75 | 5 (2.3%)       | 0.66 |
| Hemoglobin drop, gram/dL   | 1.1 ± 1.1      | 1.3 ± 1.1      | 0.10 | 1.2 ± 1.1      | 0.24 | 1.3 ± 1        | 0.14 |
| Hemoglobin drop ≥4 gram/dL | 4 (3.1%)       | 22 (3.9%)      | 0.66 | 26 (3%)        | 0.93 | 4 (1.9%)       | 0.45 |
| Chorioamnionitis           | 1 (0.8%)       | 13 (2.3%)      | 0.26 | 8 (0.9%)       | 0.88 | 3 (1.4%)       | 0.61 |
| Puerperal fever            | 2 (1.6%)       | 7 (1.3%)       | 0.78 | 6 (0.7%)       | 0.30 | 3 (1.4%)       | 0.90 |
| Blood products transfusion | 0 (0%)         | 7 (1.3%)       | 0.20 | 5 (0.6%)       | 0.39 | 2 (0.9%)       | 0.28 |
| Hysterectomy               | 0 (0%)         | 0 (0%)         | N/A  | 0 (0%)         | N/A  | 0 (0%)         | N/A  |
| In labor cesarean          | 5 (3.9%)       | 26 (4.7%)      | 0.71 | 36 (4.1%)      | 0.91 | 12 (5.6%)      | 0.49 |
| Cesarean delivery          | 12 (9.4%)      | 53 (9.5%)      | 0.97 | 96 (11%)       | 0.58 | 22 (10.2%)     | 0.80 |
| Birthweight                | 3332.4 ± 461.5 | 3283.1 ± 511.3 | 0.32 | 3292.5 ± 504.4 | 0.40 | 3305.3 ± 500.7 | 0.62 |
| Birthweight ≥4000 grams    | 6 (4.7%)       | 23 (4.1%)      | 0.77 | 33 (3.8%)      | 0.62 | 12 (5.6%)      | 0.72 |
| Large for gestational age  | 16 (12.5%)     | 65 (11.7%)     | 0.79 | 97 (11.1%)     | 0.65 | 29 (13.5%)     | 0.79 |
| Small for gestational age  | 9 (7%)         | 41 (7.4%)      | 0.90 | 63 (7.2%)      | 0.93 | 10 (4.7%)      | 0.35 |
| Intrauterine Fetal Death   | 1 (0.8%)       | 3 (0.5%)       | 0.74 | 4 (0.5%)       | 0.63 | 1 (0.5%)       | 0.71 |
| 1-Minute Apgar score < 7   | 6 (4.7%)       | 23 (4.2%)      | 0.79 | 37 (4.3%)      | 0.83 | 13 (6.1%)      | 0.59 |
| 5-Minute Apgar score < 7   | 3 (2.3%)       | 14 (2.5%)      | 0.90 | 25 (2.9%)      | 0.73 | 6 (2.8%)       | 0.80 |
| NICU admission             | 7 (5.5%)       | 36 (6.5%)      | 0.67 | 46 (5.3%)      | 0.93 | 15 (7%)        | 0.58 |
| Birth asphyxia             | 0 (0%)         | 4 (0.7%)       | 0.34 | 8 (0.9%)       | 0.28 | 1 (0.5%)       | 0.44 |

Data are mean ± standard deviation; number (%); D&C—Dilation and Curettage ICU—Intensive Care Unit, NICU Neonatal intensive-care unit. \* prolonged postpartum hospital stays of >5 days for vaginal deliveries and > 7 days for CD.
